# Supplementary material for: Comparative Transcriptome Analysis Reveals Sexually Dimorphic Gene Expression in the Gonads of Brachymystax tsinlingensis Li
Source: MDPI journal article supplement (doi:10.3390/ani13233690), 2023-11-29
Supplement: s1 [file s1]

**Table S1** List of primers used for quantitative RT-PCR validation

| Gene           | Primer sequences (5'–3')                                  | Amplicon length(bp) | Amplification efficiency |
|----------------|-----------------------------------------------------------|---------------------|--------------------------|
| <i>β-actin</i> | F: ATCCTGACGGAGCGCGGTTACAG<br>R: TGCCCATCTCCTGCTCAAAGTCCA | 112                 | 100%                     |
| <i>cyp19a</i>  | F: GACTTCGGAGAGTGCATACCA<br>R: TGCCAATACAGCTCAGACCC       | 127                 | 92%                      |
| <i>zp1</i>     | F: CAAGTCATCCAGAGGCCAGT<br>R: ATCCTTGGCCACCACAACAA        | 195                 | 94%                      |
| <i>trim25</i>  | F: CCCGCTCTGCAAGTATCAGT<br>R: TGCCTTGAGCCAAACCCATT        | 198                 | 95%                      |
| <i>parp7s</i>  | F: TCAACTGGATTACGCAGCA<br>R: ATGGAGTTCGGGCAGGTTTT         | 118                 | 91%                      |
| <i>ccnb1</i>   | F: TGTGCAGTTCCAAAGGTCCAG<br>R: TCAGTAGCGCTCTGCTTACG       | 191                 | 86%                      |
| <i>zar1</i>    | F: CCGATCAGGATGGATCGAGAG<br>R: CCTTGGACGCACCAAACG         | 127                 | 91%                      |
| <i>zp3</i>     | F: AATGCGGGTAGTCCTTTGGG<br>R: CTTTGCTGCAACAGGCTCAG        | 168                 | 91%                      |
| <i>bmp15</i>   | F: ACAGTACGTCTGCTACGACC<br>R: GTGGACAAACGAGGCTCTCA        | 138                 | 92%                      |
| <i>nanos2</i>  | F: CGCCCCGACCCATTATTTTC<br>R: CTCCTTCAGCTGGGTACAGG        | 115                 | 103%                     |
| <i>fshr</i>    | F: CCAGTGCTGAAACCCGCAT<br>R: GAAGGGGTTGGCACATGAGT         | 182                 | 92%                      |
| <i>dmrt1</i>   | F: TGAAGATGGTCGTTACCGGG<br>R: AGCGTGAGTAGAGCTTGAAGG       | 176                 | 95%                      |
| <i>tcte1</i>   | F: TGTGTGACGTCTCCTCATACG<br>R: GGGGTCAGTGGTATCAGGAATAA    | 101                 | 105%                     |
| <i>theg</i>    | F: AGCAACAGGGAGGTAAGTGC<br>R: ACGTAGAGCAGCTGTAAACCTT      | 110                 | 97%                      |
| <i>strbp</i>   | F: ACAAGGTACCACGGATGAACA<br>R: CAGGCTGGCAGTCTATTGCT       | 195                 | 95%                      |
| <i>cep4</i>    | F: AACAAACCGCCACTCAGACT<br>R: TCATGCTCAGACGCTCACTG        | 132                 | 95%                      |
| <i>pamc3ip</i> | F: CCATCGACAGTCGCATCTCT<br>R: GGGTAGGGTGCTGATAGAGC        | 113                 | 105%                     |
| <i>pvr13</i>   | F: AACATTACGCTGGGTTGCAG<br>R: CATGAAGGACAAGGGGTTCA        | 180                 | 91%                      |
| <i>sycp1</i>   | F: GGGCAGTTATCTGCTGCAATG<br>R: GCAGCTGATTA AAACTTGCTGA    | 124                 | 93%                      |
| <i>znt9</i>    | F: AAGTCCAACAAGAGTTCTGGCA<br>R: GGAGAGGGCCGTAGATTTCG      | 105                 | 95%                      |
